# Supplementary material
Source: PubMed Central journal article supplement (PMC3234784)

**Fig. S1. NudE and p150 bind to alternatively spliced dynein IC isoforms.** *A.* Sequence alignment of both IC genes from *Rattus norvegicus* (46), showing GST-fusion constructs created in this study encoding the six IC isoforms. Alternatively spliced regions are highlighted in orange. *B.* HA-NudE or FLAG-CC1 pulled down using the GST-IC isoforms. The HA-NudE bands are distorted by the similar sized GST-IC constructs.

**Fig. S2. LC8 does not affect the NudE-dynein interaction.** *A.* Immunoblot of purified rat brain dynein pulled down with purified HA-NudE, which had been pre-incubated with recombinant LC8. Lane 1, HA-NudE-LC8 pull down - no dynein present; lane 2, HA-NudE - LC8 pull-down of purified dynein; Lane 3, HA-NudE pull-down of purified dynein; lane 4, beads alone. Endogenous LC8 (endo. LC8) in the purified dynein complex runs slightly faster than recombinant LC8 (rec. LC8). *B.* HA-NudE pulldown of dynein in the presence of excess LC8. Lanes 1-4, 0x, 5x, 10x, or 50x molar ratio (over NudE) of LC8; lane 5, beads alone.

Figure S1.

**A**

|         |                                                                                                       |     |
|---------|-------------------------------------------------------------------------------------------------------|-----|
| Majonty | MSDKSDLKAELEKKQLAQI REEKKRKEEERKKKEADMQQKKEPVPDSDLRKRRETEALLQSIGISPEPP.....LVPTPMSPPS                 |     |
|         | 10 20 30 40 50 60 70 80 90 100                                                                        |     |
| IC1A    | MSDKSDLKAELEKKQLAQI REEKKRKEEERKKKEADMQQKKEPVPDSDLRKRRETEALLQSIGISPEPLVQPLHFLTWDTCYFHVLVPTPMSPPS      | 298 |
| IC1B    | MSDKSDLKAELEKKQLAQI REEKKRKEEERKKKEADMQQKKEPVPDSDLRKRRETEALLQSIGISPEPP.....LVPTPMSPPS                 | 247 |
| IC1C    | MSDKSDLKAELEKKQLAQI REEKKRKEEERKKKEADMQQKKEPVPDSDLRKRRETEALLQSIGISPEPP.....LVPTPMSPPS                 | 247 |
| Majonty | KSVSTPSEAGSQDDLGLPLTRTLQWDTDPVSLQLQSDSELGRRLNKLGVSKVTQVDFLPREVVSYSKETQTPLATHQSEEEDEEEM                |     |
|         | 110 120 130 140 150 160 170 180                                                                       |     |
| IC1A    | KSVSTPSEAGSQDDLGLPLTRTLQWDTDPVSLQLQSDSELGRRLNKLGVSKVTQVDFLPREVVSYSKETQTPLATHQSEEEDEEEM                | 556 |
| IC1B    | KSVSTPSEAGSQDDLGLPLTRTLQWDTDPVSLQLQSDSELGRRLNKLGVSKVTQVDFLPREVVSYSKETQTPLATHQSEEEDEEEM                | 505 |
| IC1C    | KSVSTPSEAGSQDDLGLPLTR.....RLNKLGVSKVTQVDFLPREVVSYSKETQTPLATHQSEEEDEEEM                                | 442 |
| Majonty | MSDKSELKAELEKKQLAQI REEKKRKEEERKKKKE TDQKKEAAVSVQEE SDLEKKRREAEALLQSMGLTTDSPIV.....PPPMSPSSKSVSTPSEAG |     |
|         | 10 20 30 40 50 60 70 80 90 100                                                                        |     |
| IC2A    | MSDKSELKAELEKKQLAQI REEKKRKEEERKKKKE TDQKKEAAVSVQEE SDLEKKRREAEALLQSMGLTTDSPIVFSEHWVPPMSPSSKSVSTPSEAG | 298 |
| IC2B    | MSDKSELKAELEKKQLAQI REEKKRKEEERKKKKE TDQKKEAAVSVQEE SDLEKKRREAEALLQSMGLTTDSPIV.....PPPMSPSSKSVSTPSEAG | 280 |
| IC2C    | MSDKSELKAELEKKQLAQI REEKKRKEEERKKKKE TDQKKEAAVSVQEE SDLEKKRREAEALLQSMGLTTDSPIV.....PPPMSPSSKSVSTPSEAG | 280 |
| Majonty | SQDSGDGAVGSR TLHWDTPSALQLHSDSDLGRGPI KLGMAKI TQVDFPPREI VTYTKE TQTPVTAQPKDEEEEDDV                     |     |
|         | 110 120 130 140 150 160 170                                                                           |     |
| IC2A    | SQDSGDGAVGSR TLHWDTPSALQLHSDSDLGRGPI KLGMAKI TQVDFPPREI VTYTKE TQTPVTAQPKDEEEEDDV                     | 532 |
| IC2B    | SQDSGDGAVGSR TLHWDTPSALQLHSDSDLGRGPI KLGMAKI TQVDFPPREI VTYTKE TQTPVTAQPKDEEEEDDV                     | 514 |
| IC2C    | SQDSGDGAVGSR.....RGP I KLGMAKI TQVDFPPREI VTYTKE TQTPVTAQPKDEEEEDDV                                   | 454 |

**B**

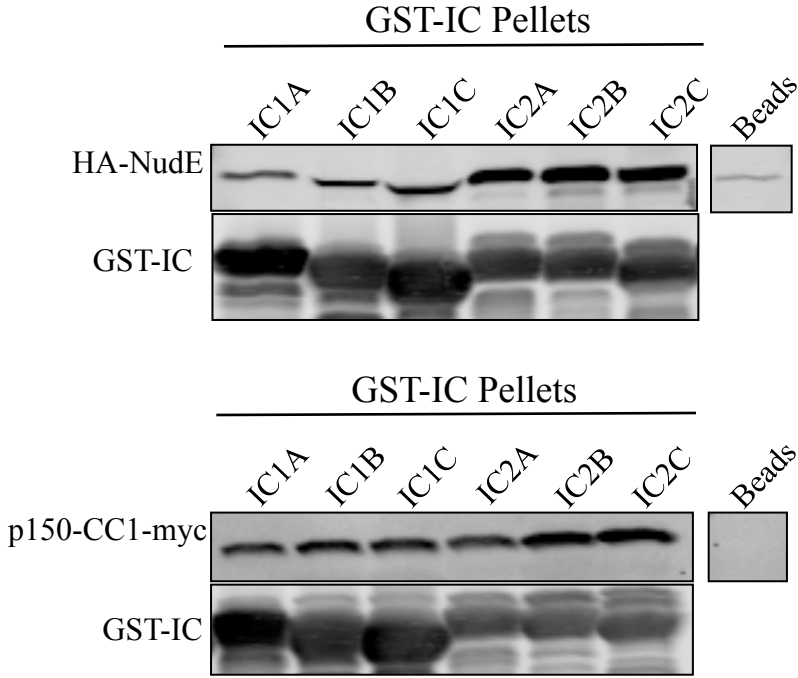

Figure S2.

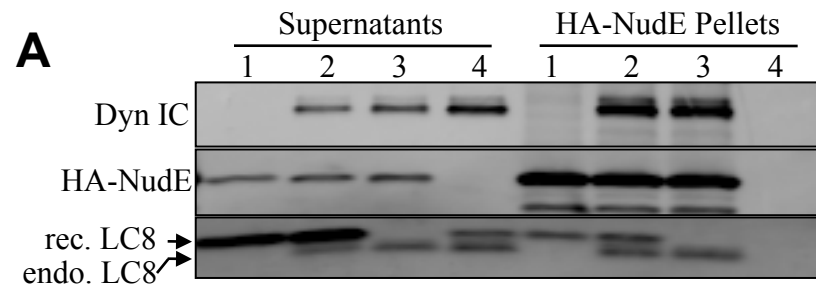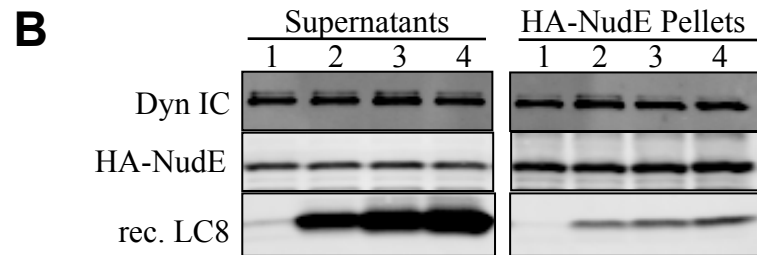

Supplement: supp_M111.289017_jbc.M111.289017-1.pdf [file supp_M111.289017_jbc.M111.289017-1.pdf]
